# Supplementary material
Source: PubMed Central journal article supplement (PMC1626605)
Supplement: plntcell_18_10_2493__1.pdf [file plntcell_18_10_2493__1.pdf]

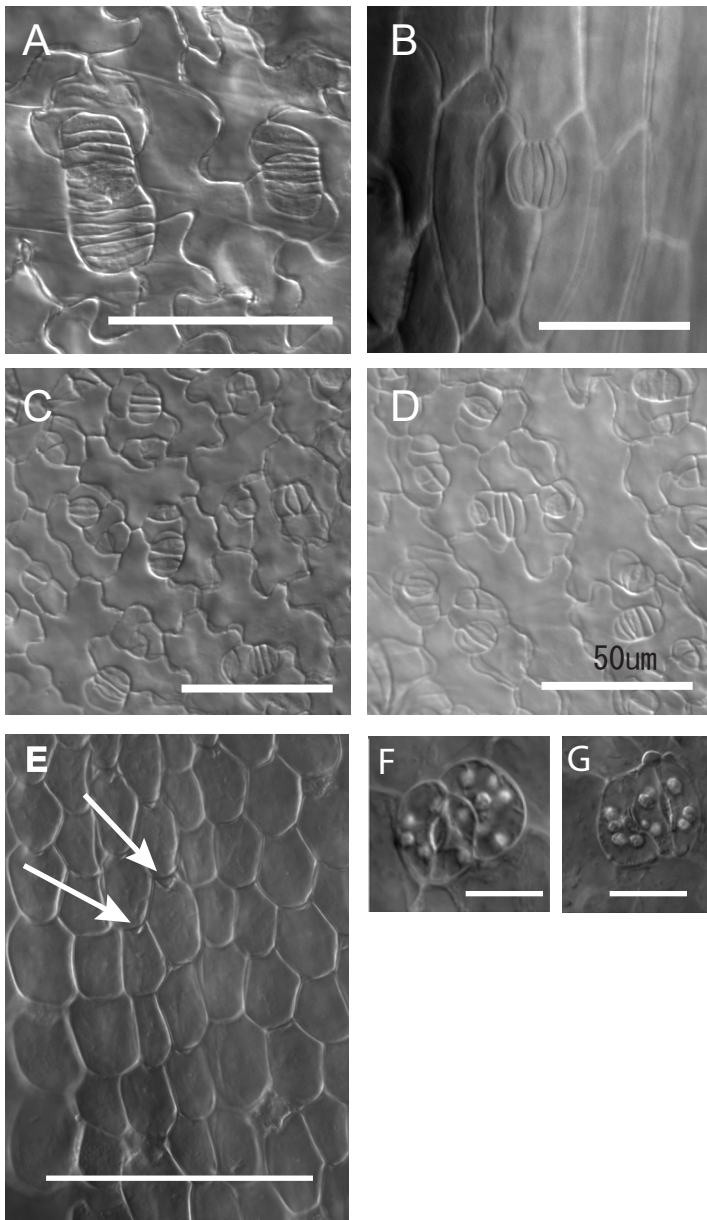

**Supplemental 1: DIC images of *fama* loss and gain of function phenotypes in aerial organs**

Clusters in *fama-1* mutants in (A) rosette leaves, (B) inflouescence stems (C) sepals (D) cauline leaf. (E) hypocotyl in *Estpro::FAMA* showing cells with pore like structures (white arrows) in all cell files. (F-G) Examples of 3-celled stomata in *fama-2*. Scale bar 50 µm except in F and G (10 µm).
