# Supplementary material
Source: PubMed Central journal article supplement (PMC1626605)
Supplement: plntcell_18_10_2493__2.pdf [file plntcell_18_10_2493__2.pdf]

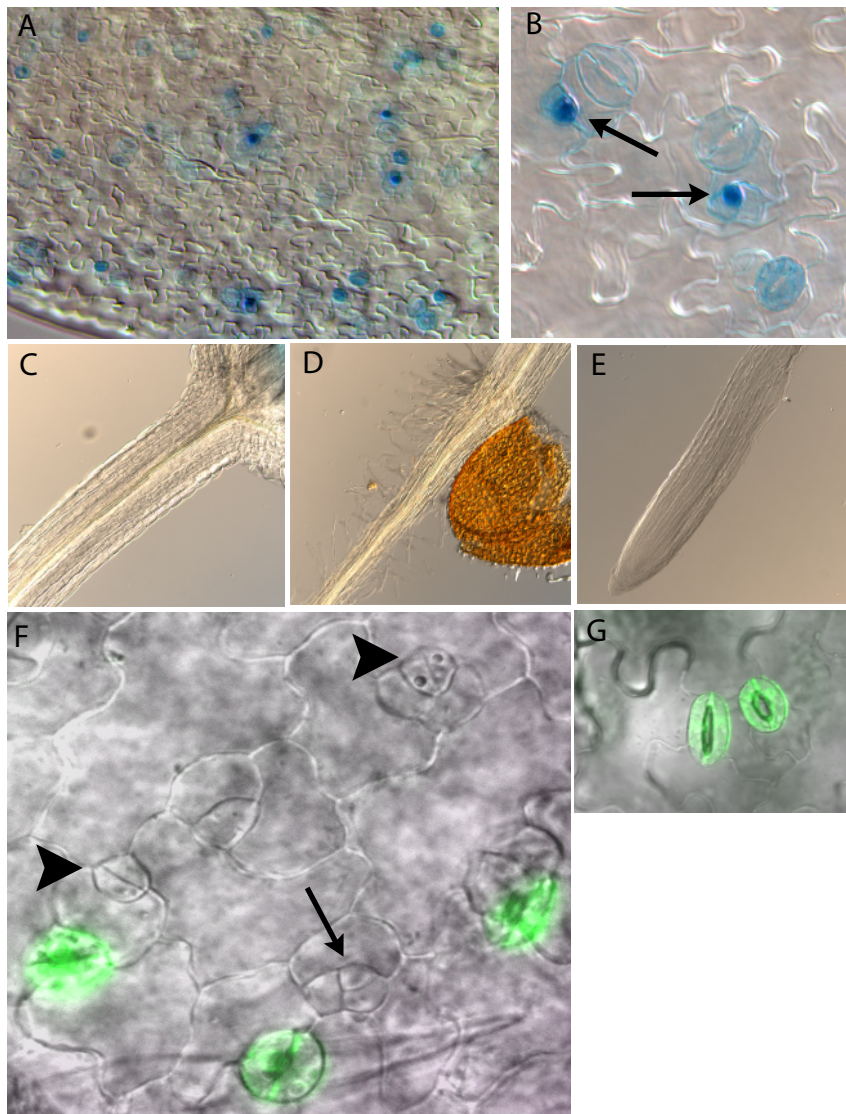

**Supplemental Figure 2: Full expression pattern of FAMA and E1728**

(A-E) FAMA expression as visualized by PROFAMA:GUS in 7-dpg seedling. (A) Margin of leaf 2. (B) Higher magnification of leaf 2. Black arrows indicate strong GUS expression in GMCs. Also note weak expression in stomata. No PROFAMA:GUS expression is seen in hypocotyl (C), or root (D-E). (F-G) Fluorescent images of E1728 GFP expression overlaid on DIC images of 5-dpg (F) and 10-dpg (G) cotyledon epidermis. Black arrowheads point to young guard cells not yet expressing this marker. Black arrow points to meristemoid.
