# Supplementary material
Source: PubMed Central journal article supplement (PMC1626605)
Supplement: plntcell_18_10_2493__3.pdf [file plntcell_18_10_2493__3.pdf]

A

| parent |              | progeny |         |            |             | results  |
|--------|--------------|---------|---------|------------|-------------|----------|
|        |              | WT      | mutant1 | fama (-/-) | muant1 fama |          |
| fama/+ | tmm/tmm      | -       | 109     | -          | 17          | additive |
| fama/+ | sdd1/+       | 41      | 21      | 8          | 3           | additive |
| fama/+ | er/erl1/erl2 | -       | 11*     | -          | 1           | additive |
| fama/+ | flp/flp      | -       | 153     | -          | 29          | additive |
| fama/+ | yoda         | 46      | 10      | 8          | 2           | additive |

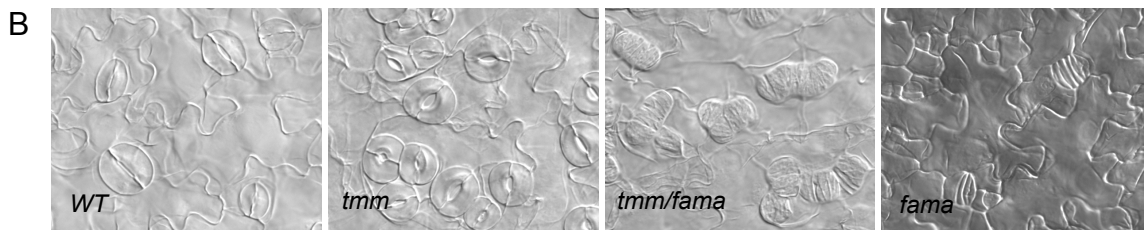

**Supplemental Figure 3: Genetic interactions between *fama* and mutations in other stomatal regulators.** (A) Table of crosses tested, all phenotypes were additive with respect to number of cells in the tumors, but the *fama-1* differentiation phenotype was always epistatic. (B) Example of *tmm; fama-1* double mutant phenotypes.
