# Supplementary material
Source: PubMed Central journal article supplement (PMC1626605)
Supplement: plntcell_18_10_2493__5.pdf [file plntcell_18_10_2493__5.pdf]

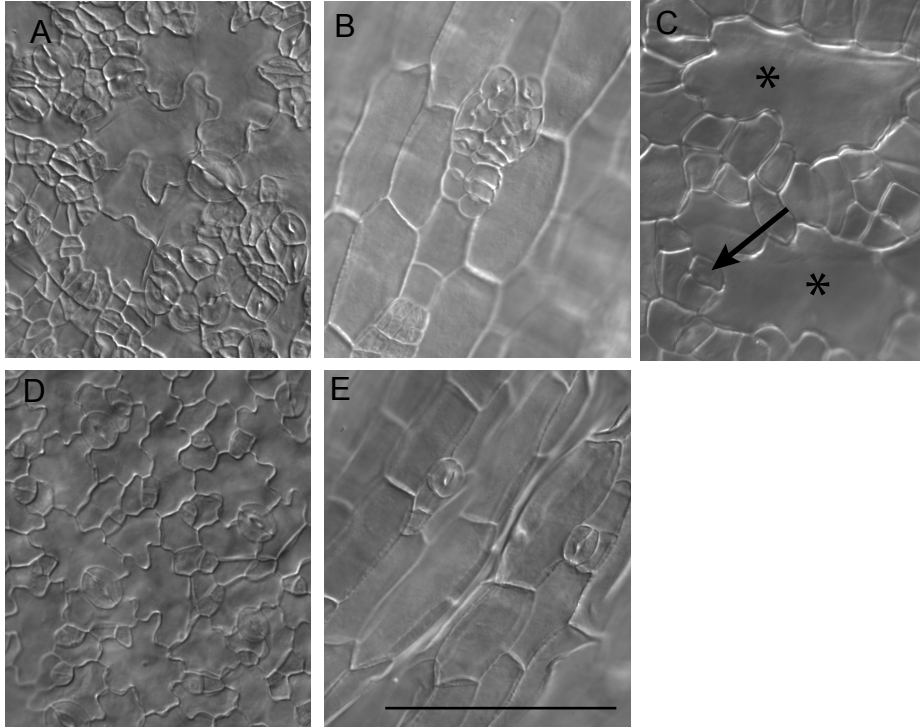

**Supplemental figure 5: Phenotypes of tissue-specific expression of FAMA protein variants.** (A-B) Ectopic stomata created by *PROTMM:FAMAPGG* expressed in Col cotyledon and hypocotyl. (C) Ectopic guard cells formed by expression of *PROTMM:FAMA*. Arrow points to pore of one set of guard cells. Pavement cells marked by \*. (D-E) No ectopic stomata created by *PROFAMA:FAMAPGG* in cotyledon or hypocotyl. All images same scale. Scale bar = 100 $\mu$ m
